# Supplementary material for: Droplet topology control of Janus emulsion prepared in one-step high energy mixing
Source: Royal Society of Chemistry journal article supplement (doi:10.1039/c4sm00456f), 2014-01-01
Supplement: c4sm00456f1.pdf [file c4sm00456f1.pdf]

Supporting Information:

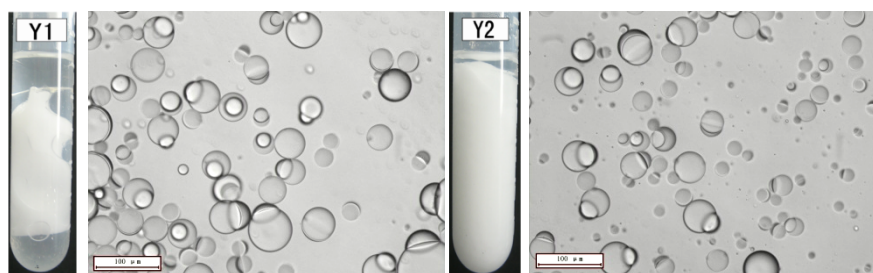

Figure S1. Optical microscopy images of emulsions Y1 and Y2 six months after preparation. The compositions of emulsions are shown in Table 1. The top layer of Y2 is VO phase.
